# Supplementary material for: Sn species modified mesoporous zeolite TS-1 with oxygen vacancy for enzyme-free electrochemical H2O2 detecting
Source: Royal Society of Chemistry journal article supplement (doi:10.1039/d2dt02926j), 2022-01-01
Supplement: d2dt02926j1.pdf [file d2dt02926j1.pdf]

## Supporting Information

### **Sn species modified mesoporous zeolite TS-1 with oxygen vacancy for enzyme-free electrochemical H<sub>2</sub>O<sub>2</sub> detecting**

Fengfeng Xue,<sup>1,2\*</sup> Ruomeng Qin,<sup>2</sup> Runwei Zhu,<sup>2</sup> Xiaoxia Zhou<sup>3</sup>

1 Shanghai University of Medicine and Health Sciences Affiliated Zhoupu Hospital, Shanghai 201318, China

2 School of Pharmacy, Shanghai University of Medicine and Health Sciences, Shanghai 201318, China

3 State Key Laboratory of High Performance Ceramics and Superfine Microstructure, Shanghai Institute of Ceramics, Chinese Academy of Sciences, Shanghai 200050, China

**Table S1.** Composition and textural properties of the zeolite TS-1 and Sn-TS-1.

| Samples | $Si/Ti$<br>[atom/atom] | $V_{total}$<br>[cm <sup>3</sup> g <sup>-1</sup> ] | $S_{micro}$<br>[m <sup>2</sup> g <sup>-1</sup> ] | $S_{meso}$<br>[m <sup>2</sup> g <sup>-1</sup> ] | $S_{total}$<br>[m <sup>2</sup> g <sup>-1</sup> ] | $d_{meso}$<br>[nm] |
|---------|------------------------|---------------------------------------------------|--------------------------------------------------|-------------------------------------------------|--------------------------------------------------|--------------------|
| TS-1    | 23                     | 0.12                                              | 201                                              | 53                                              | 254                                              | 30-80              |
| Sn-TS-1 | 28                     | 0.16                                              | 130                                              | 61                                              | 191                                              | 1.7, 30-120        |

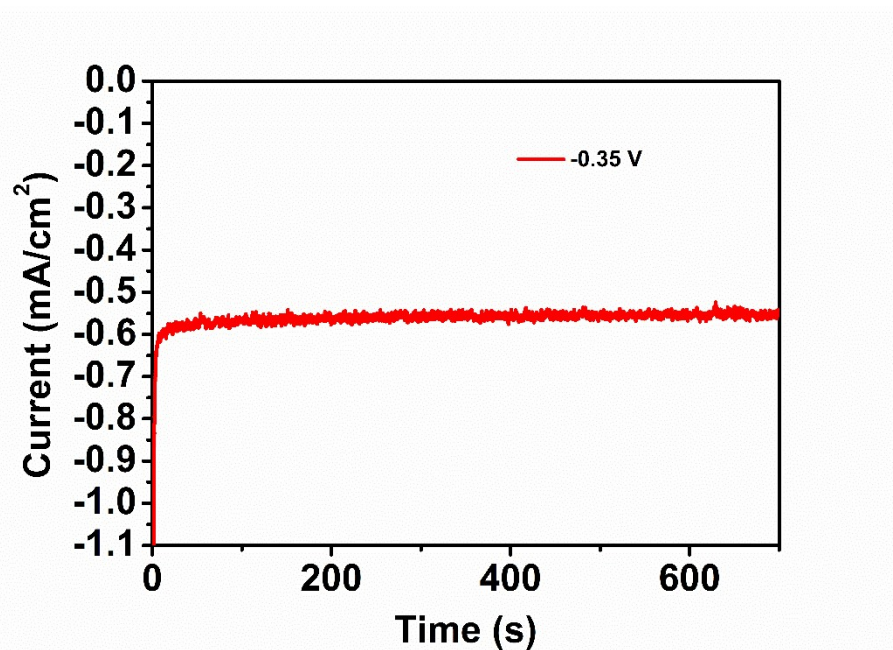

**Figure S1.** The i-t curves of Sn-TS-1 in 0.1 M PBS with 1 mM H<sub>2</sub>O<sub>2</sub> at -0.35 V.

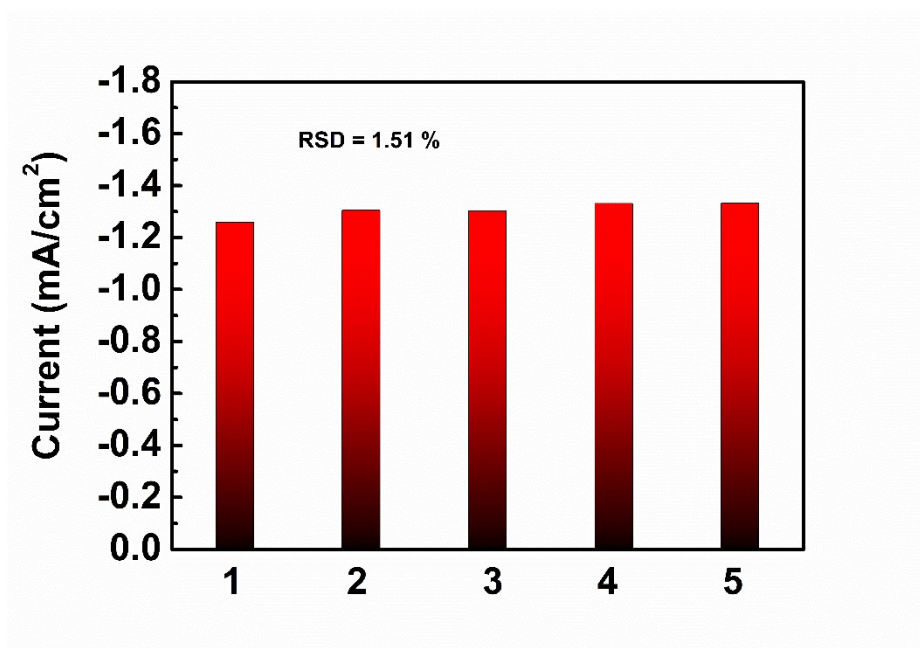

**Figure S2.** The reproducibility of 5 different Sn-TS-1 electrodes in 0.1 M PBS with 1 mM H<sub>2</sub>O<sub>2</sub>.
